# Supplementary material for: A Passive, Skin-Attachable Multi-Sensing Patch Based on Semi-Liquid Alloy Ni-GaIn for Wireless Epidermal Signal Monitoring and Body Motion Capturing
Source: MDPI journal article supplement (doi:10.3390/electronics10222778), 2021-11-13
Supplement: s1 [file s1]

## **Supplemental Information**

### **A Passive, Skin-Attachable Multi-Sensing Patch Based on Semi-Liquid Alloy Ni-GaIn for Wireless Epidermal Signal Monitoring and Body Motion Capturing**

Shipeng Lin, Jiming Fang, Tianchen Ye, Yan Tao, Shengshun Duan and Jun Wu

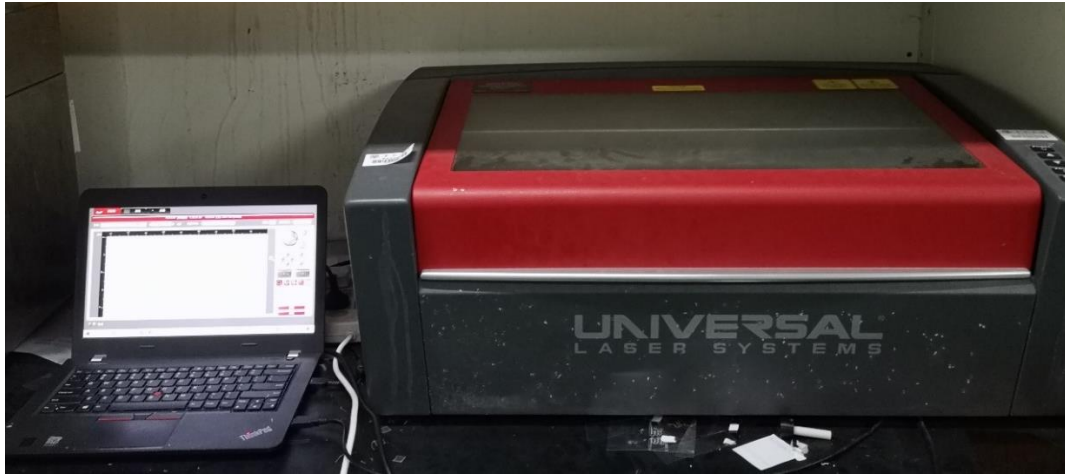

Figure S1. Using laser engraving machine to make PET film with hollow circuit pattern.

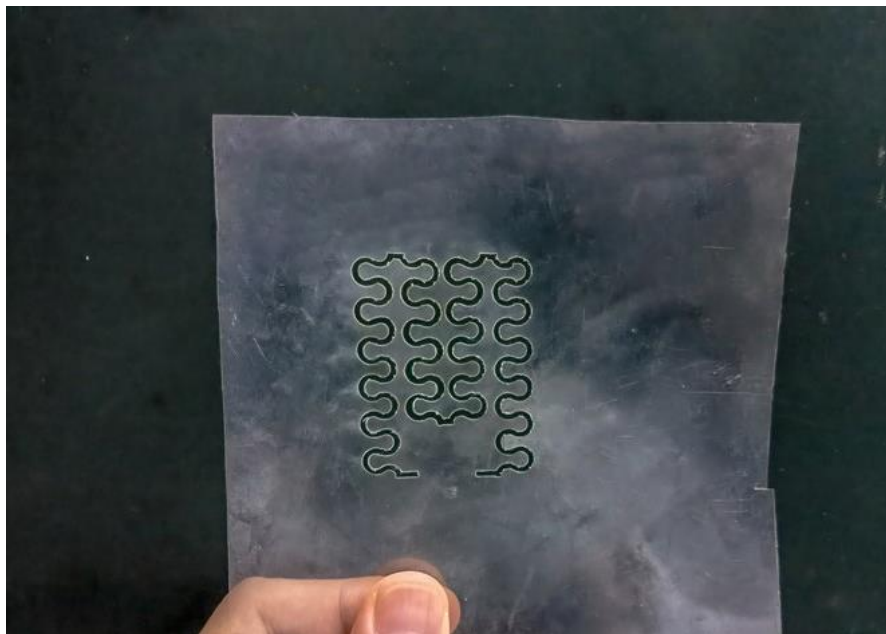

Figure S2. Thin film of polyethylene terephthalate (PET) with specific sensor pattern used for the fabrication of the strain sensor.

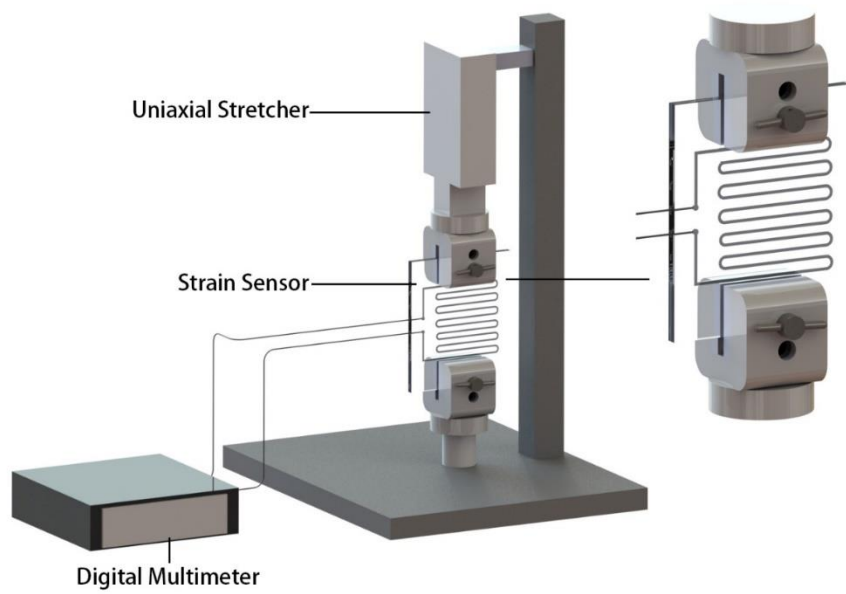

Figure S3. Illustration of resistance-uniaxial tensile strain measurement.

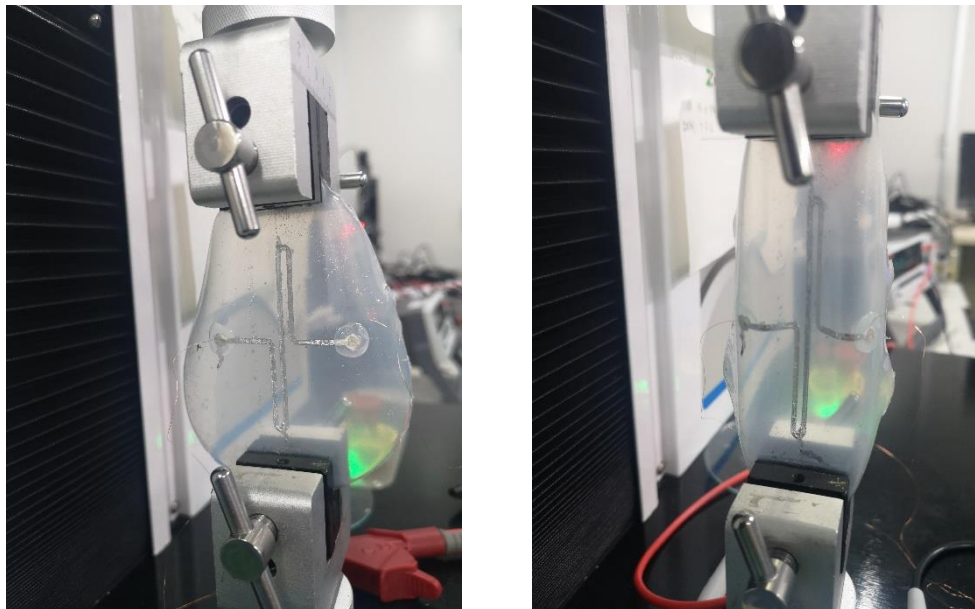

Figure S4. Characterize the relationship between resistance change and deformation of liquid metal traces on flexible substrates by using a tensile measuring instrument.

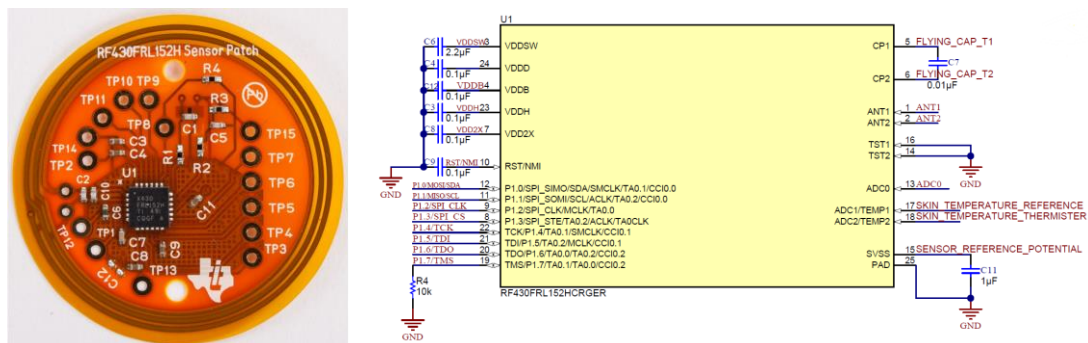

Figure S5. The physical diagram and schematic diagram of the NFC tag module.

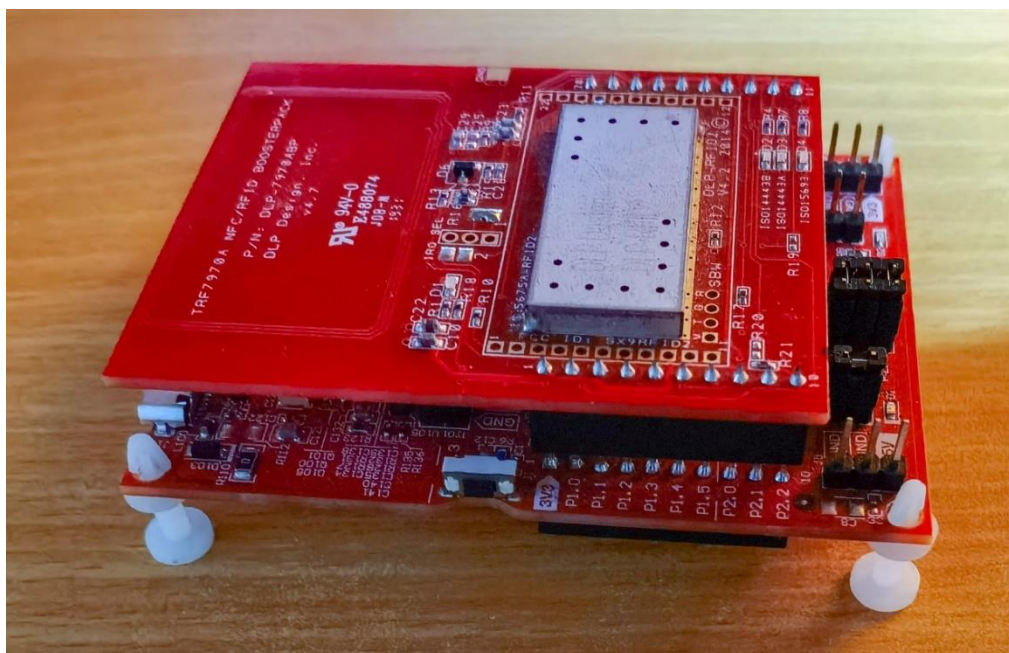

Figure S6. Physical photo of the NFC reader testing platform (the upper device is DLP7970A, and the lower is MSP430G2553).

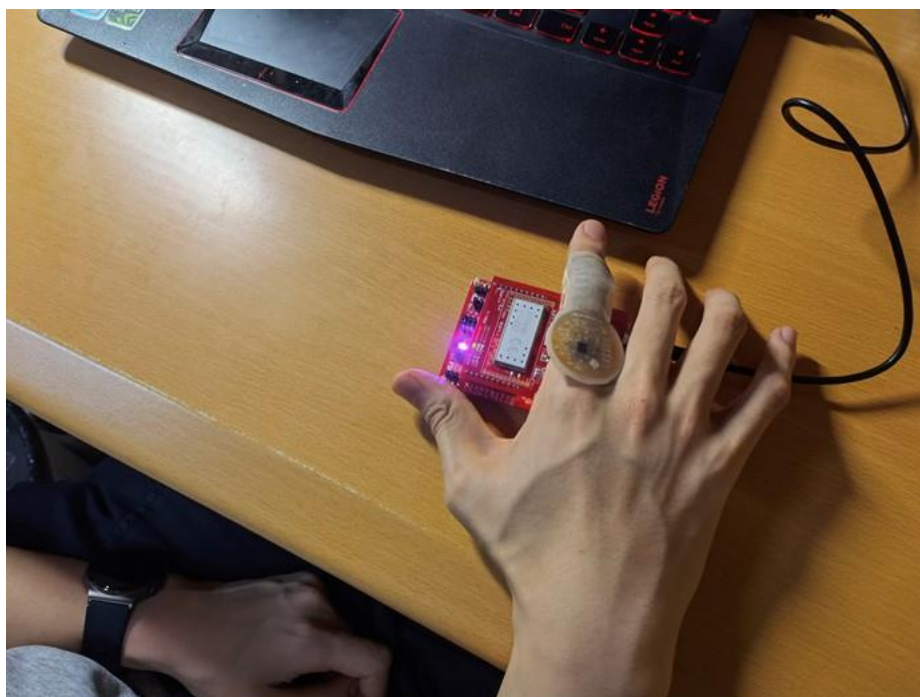

Figure S7. An example of the patch detecting the bending motion of the index finger and interacting with the external NFC reader.
